# Supplementary material for: Flight training and dietary antioxidants have mixed effects on the oxidative status of multiple tissues in a female migratory songbird
Source: Oxford University Press journal article supplement (doi:10.1242/jeb.243158), 2021-10-11
Supplement: jeb243158supp.pdf [file jeb243158supp.pdf]

**Table S1.** Effects of dietary antioxidants (high or low antioxidant diet, AH or AL, respectively) on the activity of enzymatic antioxidants (GPx, SOD, CAT), non-enzymatic antioxidant capacity (ORAC), and markers of oxidative damage (protein carbonyls and lipid hydroperoxides) in three different tissues (pectoralis, liver, and heart) in Season females sampled in fall. These fall samples from Season females were not included in the testing of the main effect of Diet (Hypothesis H1) because too many tissue samples thawed in transit from Germany to the USA (see methods for details). Estimated means and standard errors listed were calculated using estimated marginal means. Linear mixed models were fit for all analyses using bird ID as a random factor.  $\Delta AIC_c$  is the difference between the final model used and the global model with all covariates included. Estimates for the leg are not included because there were not enough observations for each diet to include in the model.

| AO Measure       | Organ      | Estimated mean $\pm$ s.e.m. | d.f.  | F     | p      | $\Delta AIC_c$ |
|------------------|------------|-----------------------------|-------|-------|--------|----------------|
| GPx              | Pectoralis | AH: 4.96 $\pm$ 0.33         | 7, 17 | 0.13  | 0.717  | 14.2           |
|                  |            | AL: 5.12 $\pm$ 0.29         |       |       |        |                |
|                  | Liver      | AH: 3.23 $\pm$ 0.38         |       | 1.40  | 0.244  |                |
|                  |            | AL: 3.83 $\pm$ 0.33         |       |       |        |                |
|                  | Heart      | AH: 4.95 $\pm$ 0.38         |       | 20.95 | 0.0001 |                |
|                  |            | AL: 7.28 $\pm$ 0.33         |       |       |        |                |
| CAT              | Pectoralis | AH: 3.00 $\pm$ 0.44         | 7, 20 | 0     | 0.999  | 16.01          |
|                  |            | AL: 3.00 $\pm$ 0.39         |       |       |        |                |
|                  | Liver      | AH: 5.82 $\pm$ 0.44         |       | 0.11  | 0.741  |                |
|                  |            | AL: 6.02 $\pm$ 0.39         |       |       |        |                |
|                  | Heart      | AH: 1.72 $\pm$ 0.52         |       | 0.16  | 0.690  |                |
|                  |            | AL: 1.98 $\pm$ 0.39         |       |       |        |                |
| SOD              | Pectoralis | AH: 0.52 $\pm$ 0.38         | 8, 19 | 0.02  | 0.892  | 8.75           |
|                  |            | AL: 0.45 $\pm$ 0.34         |       |       |        |                |
|                  | Liver      | AH: 1.39 $\pm$ 0.38         |       | 0.16  | 0.693  |                |
|                  |            | AL: 1.60 $\pm$ 0.34         |       |       |        |                |
|                  | Heart      | AH: 2.70 $\pm$ 0.44         |       | 2.64  | 0.112  |                |
|                  |            | AL: 3.63 $\pm$ 0.34         |       |       |        |                |
| Protein carbonyl | Pectoralis | AH: 3.63 $\pm$ 0.71         | 7, 19 | 0.81  | 0.374  | 17.97          |
|                  |            | AL: 4.43 $\pm$ 0.53         |       |       |        |                |
|                  | Liver      | AH: 4.80 $\pm$ 0.60         |       | 0.13  | 0.723  |                |
|                  |            | AL: 4.52 $\pm$ 0.53         |       |       |        |                |
|                  | Heart      | AH: 4.28 $\pm$ 0.60         |       | 2.90  | 0.097  |                |
|                  |            |                             |       |       |        |                |

|                      |            |                 |       |       |       |       |
|----------------------|------------|-----------------|-------|-------|-------|-------|
|                      |            | AL: 2.82 ± 0.61 |       |       |       |       |
| Lipid hydroperoxides | Pectoralis | AH: 3.21 ± 0.61 | 7, 17 | 1.64  | 0.209 | 19.74 |
|                      |            | AL: 4.24 ± 0.53 |       |       |       |       |
|                      | Liver      | AH: 3.47 ± 0.52 |       | 0.74  | 0.395 |       |
|                      |            | AL: 4.16 ± 0.62 |       |       |       |       |
|                      | Heart      | AH: 5.11 ± 0.52 |       | 0.001 | 0.971 |       |
|                      |            | AL: 5.14 ± 0.46 |       |       |       |       |
| ORAC (peroxyls)      | Pectoralis | AH: 12.5 ± 0.33 | 7, 23 | 0.13  | 0.716 | 9.21  |
|                      |            | AL: 12.3 ± 0.30 |       |       |       |       |
|                      | Liver      | AH: 13.0 ± 0.33 |       | 0.22  | 0.642 |       |
|                      |            | AL: 12.8 ± 0.30 |       |       |       |       |
|                      | Heart      | AH: 12.4 ± 0.33 |       | 2.88  | 0.098 |       |
|                      |            | AL: 11.6 ± 0.30 |       |       |       |       |
| ORAC (hydroxyls)     | Pectoralis | AH: 11.1 ± 0.23 | 8, 22 | 0.001 | 0.980 | 9.49  |
|                      |            | AL: 10.8 ± 0.21 |       |       |       |       |
|                      | Liver      | AH: 11.7 ± 0.23 |       | 0.14  | 0.715 |       |
|                      |            | AL: 11.6 ± 0.21 |       |       |       |       |
|                      | Heart      | AH: 12.0 ± 0.23 |       | 0.82  | 0.369 |       |
|                      |            | AL: 11.4 ± 0.21 |       |       |       |       |

**Table S2.** Effects of dietary antioxidants (high or low antioxidant diet, AH or AL, respectively) on oxidative damage (protein carbonyls and lipid hydroperoxides) and antioxidant capacity (ORAC) in four different tissues (pectoralis, leg, liver, and heart) in flight-trained Reproductive females in spring. Estimated means and standard errors listed were calculated using estimated marginal means. Linear mixed models were fit for all analyses using bird ID as a random factor.  $\Delta AIC_c$  is the difference between the final model used and the global model with all covariates included. Statistical analyses for enzymatic antioxidants are reported in the main text.

| <b>AO Measure</b>    | <b>Organ</b> | <b>Estimated mean <math>\pm</math> s.e.m.</b> | <b>d.f.</b> | <b>F</b> | <b>p</b> | <b><math>\Delta AIC_c</math></b> |
|----------------------|--------------|-----------------------------------------------|-------------|----------|----------|----------------------------------|
| Protein carbonyl     | Pectoralis   | AH: 3.68 $\pm$ 0.48                           | 4, 49       | 0.003    | 0.955    | 6.24                             |
|                      |              | AL: 3.72 $\pm$ 0.56                           |             |          |          |                                  |
|                      | Leg          | AH: 3.81 $\pm$ 0.57                           |             | 0.27     | 0.608    |                                  |
|                      |              | AL: 4.21 $\pm$ 0.52                           |             |          |          |                                  |
|                      | Liver        | AH: 4.50 $\pm$ 0.62                           |             | 0.59     | 0.445    |                                  |
|                      |              | AL: 5.09 $\pm$ 0.46                           |             |          |          |                                  |
|                      | Heart        | AH: 4.09 $\pm$ 0.56                           |             | 1.46     | 0.231    |                                  |
|                      |              | AL: 3.13 $\pm$ 0.57                           |             |          |          |                                  |
| Lipid hydroperoxides | Pectoralis   | AH: 3.75 $\pm$ 0.64                           | 3, 53       | 0.06     | 0.808    | 8.67                             |
|                      |              | AL: 3.57 $\pm$ 0.41                           |             |          |          |                                  |
|                      | Leg          | AH: 5.55 $\pm$ 0.47                           |             | 0.73     | 0.397    |                                  |
|                      |              | AL: 4.92 $\pm$ 0.57                           |             |          |          |                                  |
|                      | Liver        | AH: 1.93 $\pm$ 0.47                           |             | 0.07     | 0.794    |                                  |
|                      |              | AL: 2.10 $\pm$ 0.44                           |             |          |          |                                  |
|                      | Heart        | AH: 5.01 $\pm$ 0.47                           |             | 0.20     | 0.660    |                                  |
|                      |              | AL: 4.74 $\pm$ 0.41                           |             |          |          |                                  |
| ORAC (peroxylys)     | Pectoralis   | AH: 12.2 $\pm$ 0.23                           | 3, 59       | 1.31     | 0.257    | 8.16                             |
|                      |              | AL: 11.9 $\pm$ 0.20                           |             |          |          |                                  |
|                      | Leg          | AH: 12.2 $\pm$ 0.22                           |             | 0.97     | 0.330    |                                  |
|                      |              | AL: 12.4 $\pm$ 0.19                           |             |          |          |                                  |
|                      | Liver        | AH: 15.5 $\pm$ 0.22                           |             | 0.01     | 0.938    |                                  |
|                      |              | AL: 12.5 $\pm$ 0.19                           |             |          |          |                                  |
|                      | Heart        | AH: 12.1 $\pm$ 0.22                           |             | 0.06     | 0.802    |                                  |
|                      |              | AL: 12.2 $\pm$ 0.19                           |             |          |          |                                  |
| ORAC (hydroxylys)    | Pectoralis   | AH: 10.7 $\pm$ 0.18                           | 4, 58       | 0.05     | 0.817    | 5.06                             |

---

|       |                     |      |       |
|-------|---------------------|------|-------|
|       | AL: $10.8 \pm 0.16$ |      |       |
| Leg   | AH: $11.2 \pm 0.17$ | 2.58 | 0.113 |
|       | AL: $11.5 \pm 0.15$ |      |       |
| Liver | AH: $11.5 \pm 0.17$ | 0.04 | 0.847 |
|       | AL: $11.5 \pm 0.15$ |      |       |
| Heart | AH: $11.3 \pm 0.17$ | 0.68 | 0.413 |
|       | AL: $11.5 \pm 0.15$ |      |       |
